# Supplementary material for: Further evidence for small-bodied hominins from the Late Pleistocene of Flores, Indonesia
Source: Springer Nature journal article supplement (doi:10.1038/nature04022), 2005-10-01
Supplement: 41586_2005_BFnature04022_MOESM2_ESM.pdf [file 41586_2005_BFnature04022_MOESM2_ESM.pdf]

## Supplementary information

|                             |      |       |     |
|-----------------------------|------|-------|-----|
| Mandible dimensions         | LB1  | LB6/1 | LB2 |
| Symphysial height           | 28   | 27    | -   |
| Symphysial thickness        | 15   | 16    | -   |
| Corpus height M1-M2         | 20.5 | 22.9  | -   |
| Corpus thickness M1         | 15   | 14    | -   |
| External arch breadth M1-M1 | 51   | 48.5  | -   |
| Minimum ramus breadth       | 36   | 36.5  | -   |
| Tooth crown dimensions      |      |       |     |
| P3 buccolingual             | 7.9  | 7.6   | 8.6 |
| P3 mesiodistal              | 9.1  | 8.1   | 9.0 |
| P4 buccolingual             | -    | 7.6   | -   |
| P4 mesiodistal              | -    | 5.8   | -   |
| M1 buccolingual             | 11.4 | 10.0  | -   |
| M1 mesiodistal              | 8.6  | 8.2   | -   |
| M2 buccolingual             | 10.7 | 9.7   | -   |
| M2 mesiodistal              | 10.0 | 8.7   | -   |
| M3 buccolingual             | 10.0 | 8.9   | -   |
| M3 mesiodistal              | 9.5  | 7.9   | -   |

**SUPPLEMENTARY TABLE S2.** Comparison of mandible and tooth crown dimensions for LB1, LB6/1 and LB2 (mm). All mesiodistal crown dimensions have been reduced by interproximal tooth wear.

|                                                    | Liang Bua<br>1 and 6 | E. African<br>early <i>Homo</i> | E. African<br><i>H. erectus</i> | Sangiran<br><i>H. erectus</i> | Chinese<br><i>H. erectus</i> | Dmanisi<br><i>H. erectus</i> |
|----------------------------------------------------|----------------------|---------------------------------|---------------------------------|-------------------------------|------------------------------|------------------------------|
| MD elongation of P3 crown                          | yes                  | yes                             | yes                             | no                            | no                           | variable                     |
| Complex P3 root morphology (multiple or Tome's)    | yes                  | yes                             | yes                             | variable                      | no                           | variable                     |
| Complex P4 root morphology (multiple or Tome's)    | yes                  | yes                             | yes                             | variable                      | no                           | unknown                      |
| Advanced molar crown reduction                     | yes                  | no                              | yes                             | yes                           | yes                          | yes                          |
| M1≥M2>M3                                           | yes                  | no                              | yes                             | yes                           | yes                          | yes                          |
| Relatively wide alveolar arcade                    | no                   | no                              | variable                        | yes                           | yes                          | no                           |
| Mandibular corpus comparatively thin               | no                   | no                              | no                              | yes                           | yes                          | variable                     |
| Symphysis comparatively thin                       | no                   | no                              | no                              | yes                           | yes                          | variable                     |
| Weak expression of posterior symphyseal structures | no                   | no                              | variable                        | yes                           | yes                          | variable                     |
| Broad extramolar sulcus                            | yes                  | yes                             | variable                        | yes                           | no                           | no                           |

**SUPPLEMENTARY TABLE S3.** Morphological features shared by LB1 and LB6/1 that distinguish them from East African early *Homo*, and African, Asian and European *H. erectus*. Data for early *Homo* and *H. erectus* modified from ref.<sup>1</sup>. The Liang Bua mandibles share more traits in common with East African early *Homo* and *H. erectus* than with *H. erectus* populations outside of Africa.

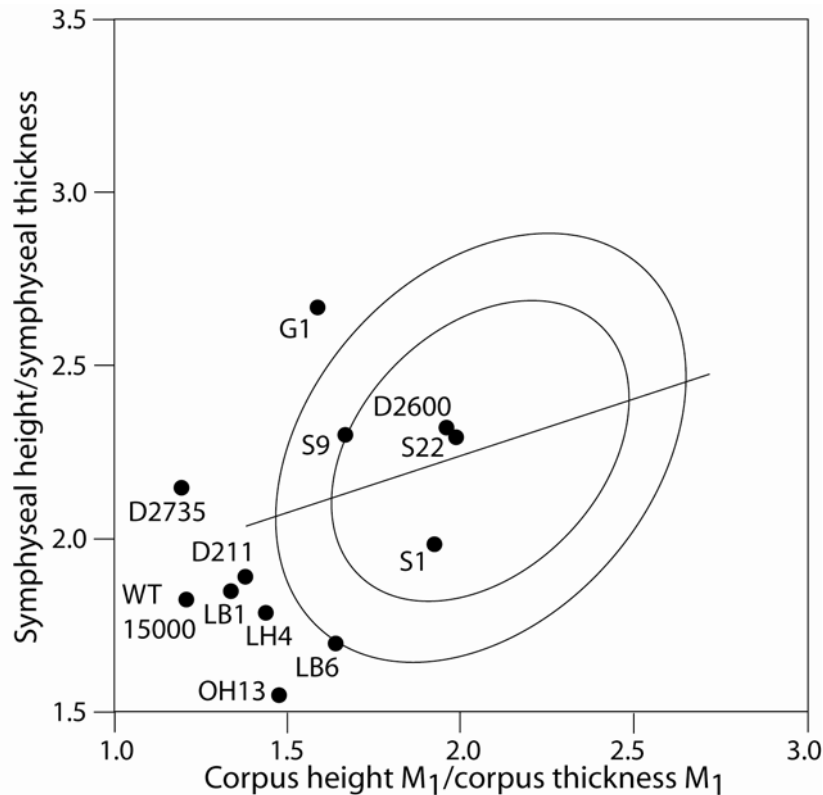

**SUPPLEMENTARY FIGURE 1.** Comparison of mandibular corpus height/thickness and symphysis height/thickness ratios in LB1 and LB6 with a robust modern human sample<sup>2</sup> (n=478, 90% and 68% confidence ellipses and least squares regression line), *Homo erectus* from Sangiran<sup>3</sup> (S1, S9, S22), Zhoukoudian<sup>4</sup> (G1), Dmanisi<sup>5,6</sup> (D211, D2735, D2600), and West Turkana<sup>7</sup> (KNM WT-15000), Olduvai early *Homo*<sup>8</sup> (OH 13), and Laetoli *A. afarensis*<sup>9</sup> (LH4). Both D2735 and WT-15000 are subadults. The two Liang Bua mandibles share with OH13, LH4, WT15000 and two of the Dmanisi mandibles, a symphysis and corpus which are thickened relative to the height of the same regions. For the symphysis this is the result of not having a trigonum mentale, having a well developed alveolar planum and superior transverse torus, a deep diagastric fossa and a strong posterior angulation of the symphyseal axis. This symphyseal morphology is distinct from the pattern in modern humans, and known examples of Asian *Homo erectus*. While Zhoukoudian and Sangiran *H. erectus* do not have a trigonum mentale their posterior symphyseal morphology is within the range of variation in modern humans, as is the height/thickness ratios of their alveolar segments. The Dmanisi mandibles exhibit a great deal of variation, both in size and morphology<sup>5,6</sup>. In their overall symphyseal

morphology the Liang Bua mandibles are more similar to African *A. afarensis* (Supplementary Figure 2) and to a lesser degree WT-15000 and D211, than to Asian *H. erectus*.

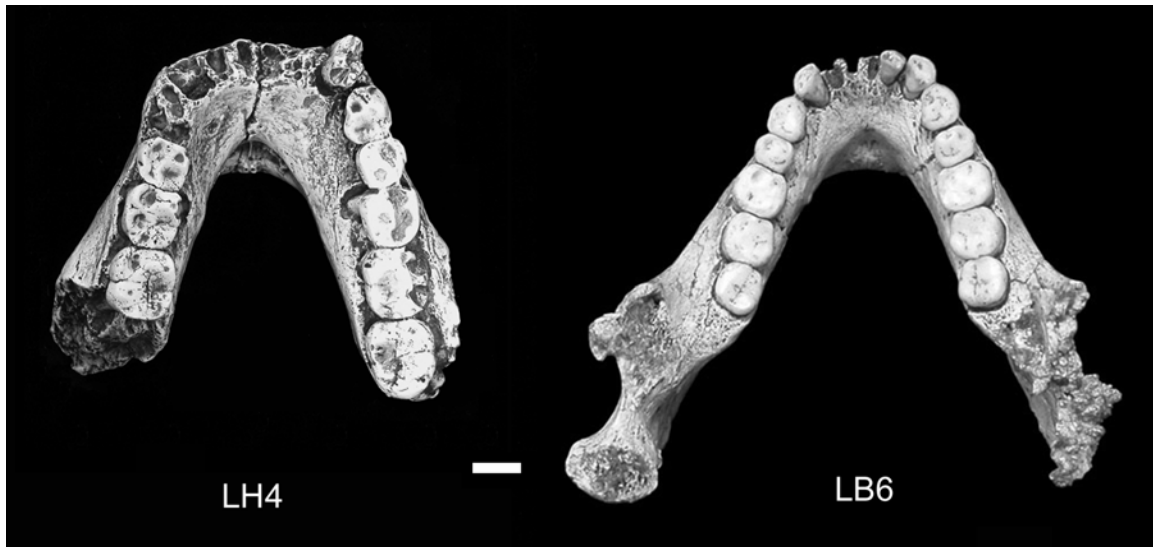

**SUPPLEMENTARY FIGURE 2.** Occlusal views of Laetoli *Australopithecus afarensis* mandible LH4 and Liang Bua *Homo floresiensis* mandible LB6. Similarities include the shape of the dental arch, and the morphology of the posterior symphysis and P3 crown. Differences are most obvious in the larger size of LH4, considerably greater postcanine tooth dimensions in LH4, with  $M1 < M2 < M3$ , and the more anterior position of the lateral prominence in LH4.

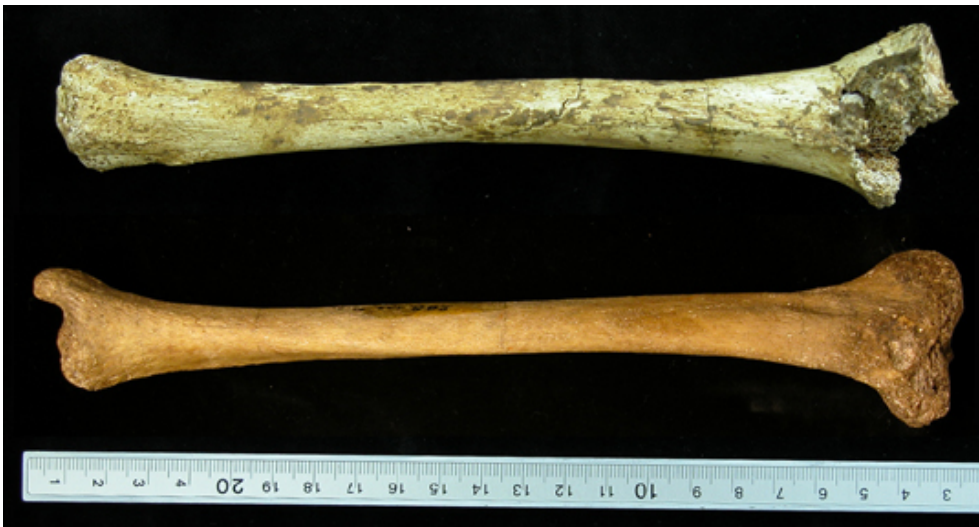

**SUPPLEMENTARY FIGURE 3.** The LB8 right tibia has an incomplete medial condyle, the lateral intercondylar eminence is fairly complete, and the medial malleolus is not preserved. Maximum length of the tibia (Martin and Saller 1a) was calculated after

estimating the projection of the medial malleolus from the distal articular surface. Using 10 African Pygmy tibia scaled to the same length the projection averaged 7 mm. This achieved a maximum tibia length of 216 mm. As the medial malleolus is not preserved in either of the LB1 tibia, and LB8 is from a species with different postcranial dimensions and anatomy to *H. sapiens* it is not known how accurate this estimate is.

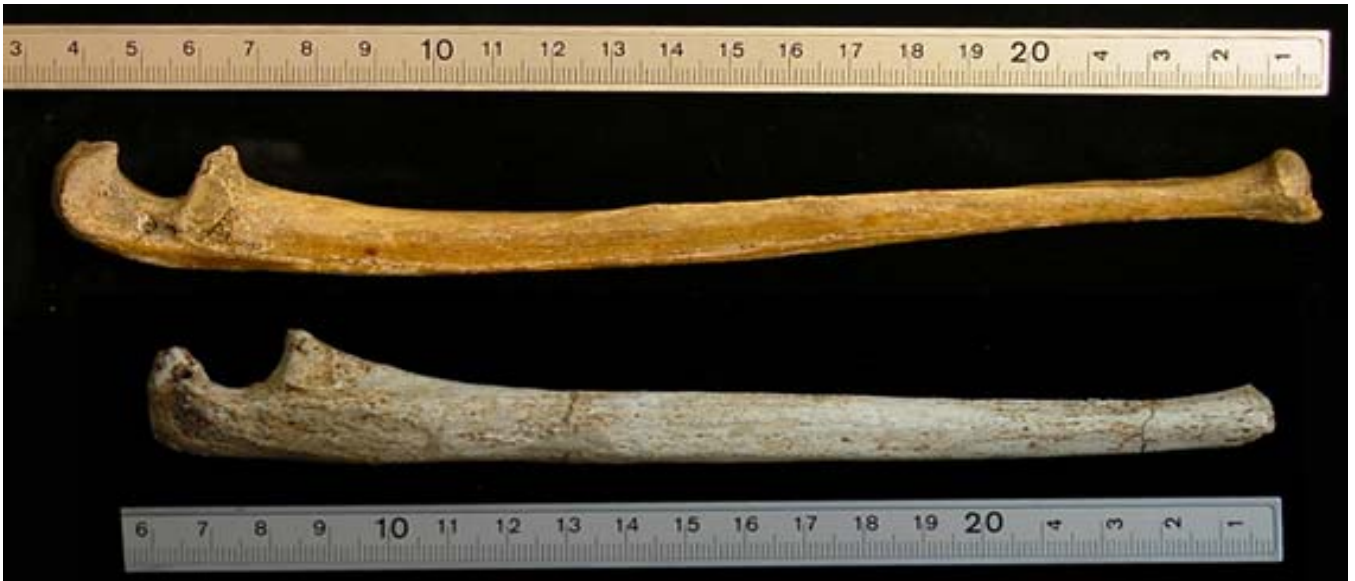

**SUPPLEMENTARY FIGURE 4.** The LB1 right ulna is missing its head and distal end of the shaft. Estimation of the length of the missing segment was made by comparison with the ulna of small-bodied humans (10 African pygmy ulna). The LB1 ulna shaft is broken just as it starts to expand towards the distal articular surface. Comparison with human Pygmy ulna suggest that the missing section was approximately 15 mm in length, which would give the LB1 ulna shaft section of 190 mm an approximate maximum length of 205 mm. As LB1 is from a species with different postcranial dimensions and anatomy to *H. sapiens* it is not known how accurate this estimate is.

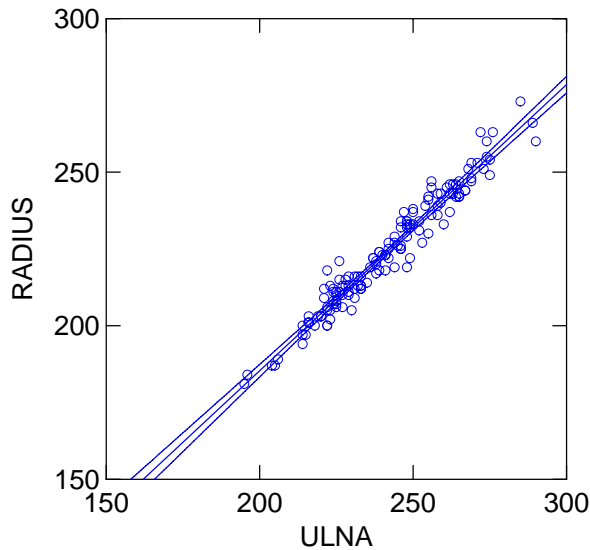

**SUPPLEMENTARY FIGURE 5.** The approximate maximum length of the LB1 radius was estimated from LB1 maximum ulna length using data for ulna length and radius length in modern humans (n.137) and least squares regression. Using these data, radius length =  $-4.32 + 0.949 \text{ ulna length}$  (SE 4.208, multiple R 0.972, squared multiple R 0.944). With a maximum ulna length of 205mm this equation estimates the maximum radius length of LB1 as 190mm, with an SE 4.208. As LB1 is from a species with different postcranial dimensions and anatomy to *H. sapiens* it is not known how accurate this estimate is.

1. Kaifu, Y. et al. Taxonomic affinities and evolutionary history of the Early Pleistocene hominids of Java: dento-gnathic evidence. *American Journal of Physical Anthropology* (In Press).
2. Brown, P. et al. A new small-bodied hominin from the Late Pleistocene of Flores, Indonesia. *Nature* **431**, 1056-1061 (2004).
3. Kaifu, Y., Aziz, F. & Baba, H. Hominid mandibular remains from Sangiran: 1952-1986 collection. *American Journal of Physical Anthropology* (In Press).
4. Weidenreich, F. The mandible of *Sinanthropus pekinensis*. A comparative study. *Palaeontologica Sinica* **D7**, 1-132 (1936).
5. Brauer, G. & Schultz, M. The morphological affinities of the Plio-Pleistocene mandible from Dmanisi, Georgia. *Journal of Human Evolution* **30**, 445-481 (1995).
6. Gabunia, L. K., de Lumley, M. A., Vekua, A. K., Lordkipanidze, D. & de Lumley, H. Decouverte d'un nouvel hominide a Dmanissi (Transcaucasie, Georgie). *Comptes Rendus Palevol* **1**, 242-253 (2002).
7. Walker, A. C. & Leakey, R. (eds.) *The Nariokotome Homo erectus skeleton* (Harvard University Press, Cambridge, 1993).

8. Leakey, L. S. B., Tobias, P. V. & Napier, J. R. A new species of the genus *Homo* from Olduvai Gorge. *Nature* **202**, 5-9 (1964).
9. White, T. D. & Johanson, D. C. Pliocene hominid mandibles from the Hadar formation, Ethiopia: 1974-1977 collections. *American Journal of Physical Anthropology* **57**, 501-544 (1982).
